# Supplementary material
Source: PubMed Central journal article supplement (PMC5419471)
Supplement: 215FileS12.pdf [file 215FileS12.pdf]

Supporting Information

**Extrinsic repair of injured dendrites as  
a paradigm for regeneration by fusion  
in *Caenorhabditis elegans***

Meital Oren-Suissa, Tamar Gattegno, Veronika Kravtsov, and Benjamin Podbilewicz

Department of Biology, Technion- Israel Institute of Technology, Haifa 32000, Israel

## Supplementary Figures

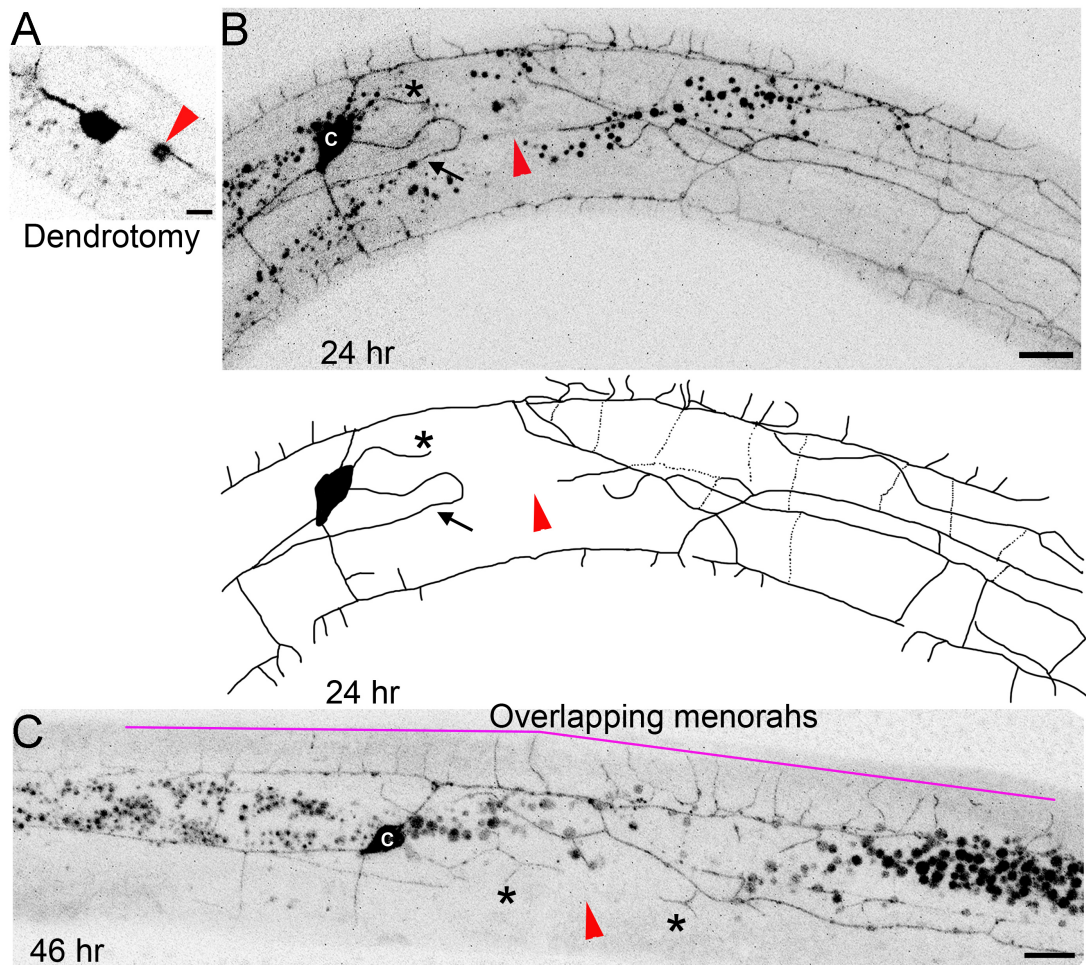

**Fig S1. Dendritic injury induces hyper-branching, loss of self-avoidance and giant overlapping menorahs**

(A) Wild-type animal injured (red arrowhead) at the early L4 stage, recovered and analyzed 24 (B) and 46 hr (C) post-surgery. Black arrow, retrograde branch. The degenerating branches are represented as dotted lines in the schematic tracing. Scale bars represent 5  $\mu\text{m}$  (A) and 10  $\mu\text{m}$  (B,C).

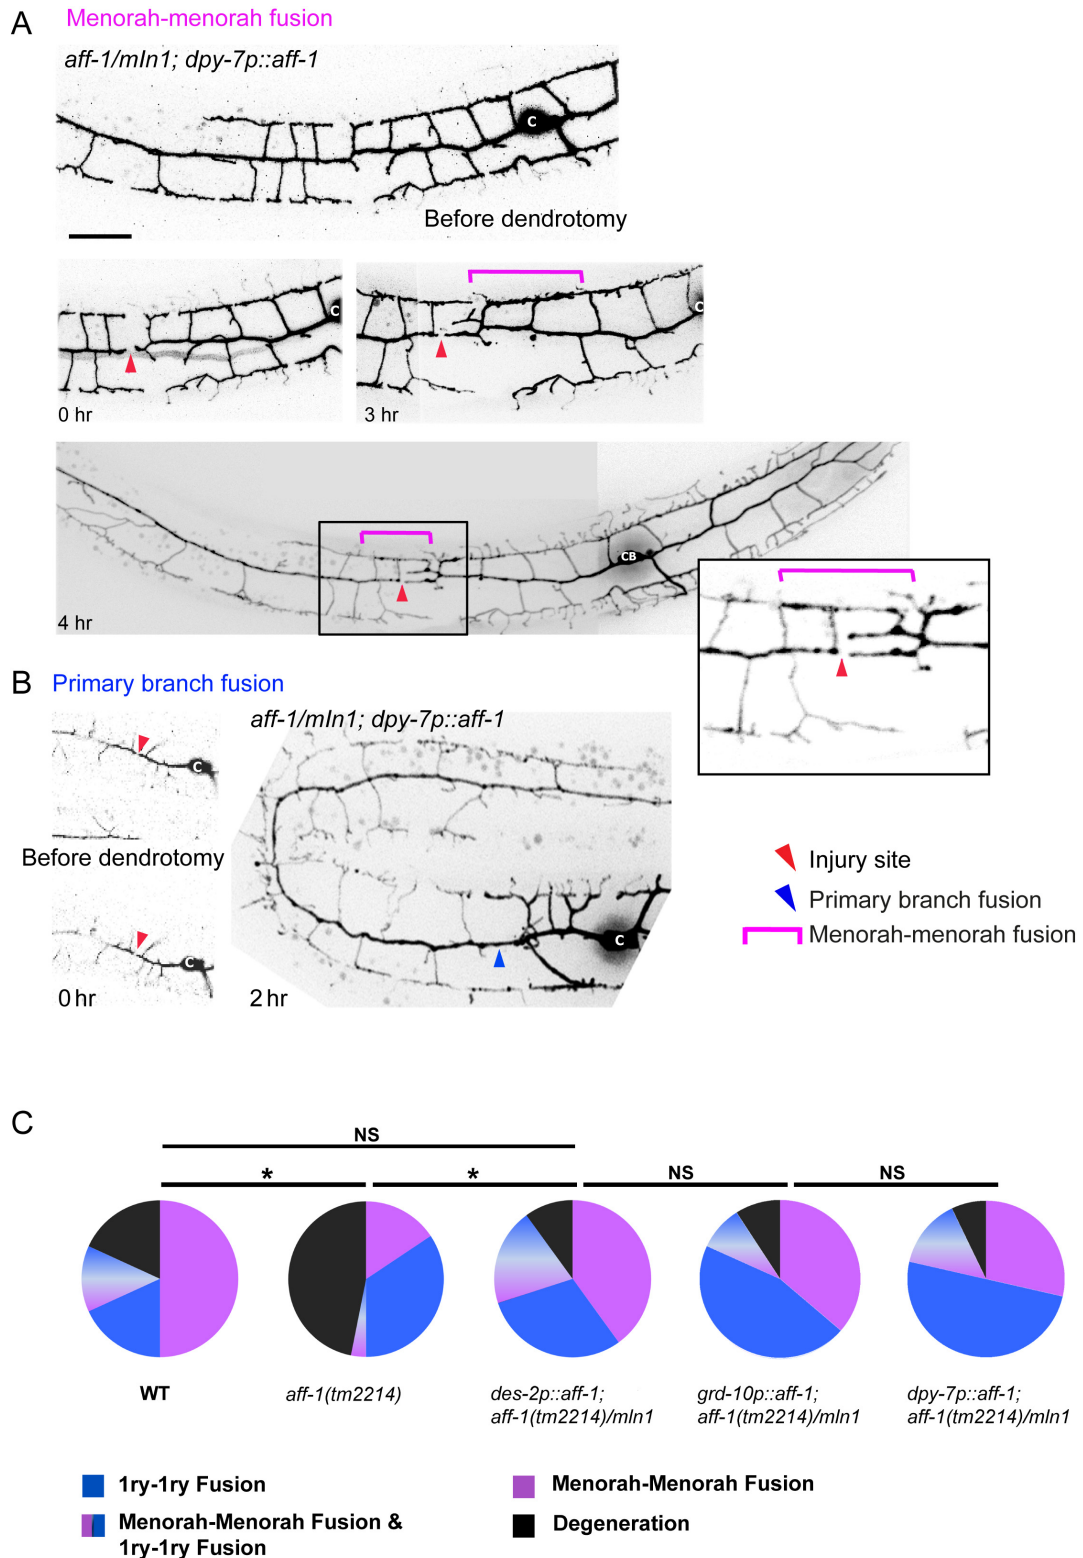

**S2 Fig. Ectopic expression of AFF-1 does not improve PVD regeneration in heterozygous animals**

(A) Regeneration by menorah-menorah fusion following PVD nanosurgery in *C. elegans* *aff-1(tm2214)/mln1; dpy-7p::aff-1* animals. PVD is shown before and after nanosurgery (T=0, 3, and 4 hr). PVD reconnection occurred through

fused menorahs (magenta bracket) and primary fusion did not occur (red arrowhead).

**(B)** Dendrite regeneration following PVD primary branch nanosurgery in *C. elegans aff-1(tm2214)/mln1; dpy-7p::aff-1* animals. PVD is shown before and after nanosurgery (T=0 and 2 hr). PVD reconnection occurred through primary fusion (blue arrowhead).

**(C)** Animals showing different PVD post injury consequences displayed in color coded pie graphs as Magenta- Menorah-Menorah fusion, Blue- primary-primary fusion, Magenta and Blue- Menorah-Menorah fusion and primary-primary fusion, Black-degeneration. Wild type n=22; *aff-1(tm2214)* n=32; *aff-1/mln1*; *des-2p::AFF-1* n=10, *aff-1(tm2214) /mln1*; *grd-10p::aff-1* n=11, *aff-1(tm2214)/mln1; dpy-7p::aff-1* n=14. \*P<0.05. P values for wild type and heterozygous genotypes are not significant (NS). Statistics was calculated using the Freeman-Halton extension of the Fisher exact probability test for a two-rows by four-columns contingency table, <http://vassarstats.net/fisher2x4.html>.

Dendrotomy site, red arrowhead; fused Menorah, magenta bracket; primary fusion, blue arrowhead. Scale bars represent 20  $\mu$ m.

## Supplemental movies captions

### **File S1. PVD dendrites touch and fuse following dendrotomy**

Time lapse recording of an L4 wild-type animal just after injury. The z series images were recorded every 6 min, marker is *F49H12.4::GFP*. Arrows mark areas of fusing menorah tertiary branches. C marks PVD cell body.

### **File S2. A pseudo-colored presentation of depth information for File S1**

Scale bar for the position in the z axis is shown at the bottom. The movie was obtained using the Zeiss LSM image browser DepthCod function.

### **File S3. Degeneration of the distal fragment following dendrotomy**

Time lapse recording of a wild-type L4 animal after a two-photon injury. Posterior PVCR and PVCL are also marked with the *DES-2::GFP* marker and can be seen at the upper right corner. See **Fig 1G**.

### **File S4. Fusion and pruning during the PVD regeneration process**

Intensity-values view of a time-lapse recording of an early L4 animal. Marker is *F49H12.4::GFP*. Menorahs from proximal and distal ends meet and fuse, bypassing the break induced by the two-photon injury. At the injury site growth and pruning of dendrites can be seen. Intensity scale bar is in **Fig 2D**.

### **File S5. *AFF-1::GFP* expression in PVD intact animals**

Time lapse recording of *AFF-1::GFP* (cyan) expression inside and outside the seam cells (sc), and in the vulva (V) of an intact L4 animal shown in a two channels merged image. The z series images were recorded every 10 sec, PVD marker is *F49H12.4p::mCherry* (magenta). Arrows mark *AFF-1* vesicles. See **Fig 4B**. The trajectory of vesicle 1 is shown in **Fig 4E**. Gut marks autofluorescent gut granules, easily distinguishable from *AFF-1* vesicles in size, shape, and appearance in both channels.

### **File S6. *AFF-1::GFP* expression in PVD intact animals (zoom in of file S5)**

A magnification of a single *AFF-1::GFP* vesicle near the seam cells, ("vesicle 1").

### **File S7. *AFF-1::GFP* expression in PVD primary branch of injured animals**

Time lapse recording of *AFF-1::GFP* expression (cyan) inside and outside the seam cells (sc), in the anchor cell (AC) and in the vulva (V) of a reconnected PVD L4 animal after a two-photon injury anterior to PVD cell body. T=0 is 75 min after injury. The z series images were recorded every 20 sec, PVD marker is *F49H12.4p::mCherry* (magenta). Arrows point to vesicles containing *AFF-1::GFP*.

### **File S8. Magnification of File S7**

Magnification of an area with multiple vesicles, two are labeled (2,3). See **Fig 4 D-E**.

**File S9. AFF-1::GFP expression in PVD intact animal**

Time lapse recording of *AFF-1::GFP* (cyan) expression inside and outside the seam cells (SC) of an intact L4 animal shown in a two channels merged image. The z series images were recorded every 10 sec, PVD marker is *F49H12.4p::mCherry* (magenta). Arrows mark AFF-1 vesicles.

**File S10. AFF-1::GFP expression in a degraded PVD primary branch of injured animals**

Time lapse recording of *AFF-1::GFP* expression (cyan) inside and outside the seam cells (sc) of a reconnected PVD L4 animal after a two-photon injury anterior to PVD cell body, red arrowhead is the site of injury. T=0 is 75 min after injury. The z series images were recorded every 2 sec, PVD marker is *F49H12.4p::mCherry* (magenta). Arrows point to vesicles containing AFF-1::GFP.

**File S11. AFF-1::GFP expression in a degraded PVD primary branch of injured animals**

Time lapse recording of *AFF-1::GFP* expression (cyan) inside and outside the seam cells (sc) of a reconnected PVD L4 animal after a two-photon injury anterior to PVD cell body, red arrowhead is the site of injury. T=0 is 150 min after injury. The z series images were recorded every 2 sec, PVD marker is *F49H12.4p::mCherry* (magenta). Arrows point to vesicles containing AFF-1::GFP.
